# Supplementary material for: CD40 Monoclonal Antibody and OK432 Synergistically Promote the Activation of Dendritic Cells in Immunotherapy
Source: Research Square preprint supplement (doi:10.21203/rs.3.rs-1113492/v1), 2022-02-17
Supplement: Supplementary file 1 [file 776601d5474ab8624b186ee4.docx]

**Supplemental tables**

**Table S1**

**Agents used in the FCM**

| **Reagents** | **Company** | **Product #** |
| --- | --- | --- |
| CD8a--PerCp | Miltenyi Biotec, Germany | 53-6.7/130-122-953 |
| CD80--FITC | Miltenyi Biotec, Germany | 16-10A1/130-102-882 |
| CD86--PE | Miltenyi Biotec, Germany | PO3.3/130-123-724 |
| CD11c--FITC | Miltenyi Biotec, Germany | N418/130-122-939 |
| CD11b--PE | Miltenyi Biotec, Germany | REA592/130-113-806 |
| CD40 Ab (FGK45) | AdipoGen, USA | AG-20B-0036PF |
| OK-432 | T&L Biological Technology, China | GMP-TL107-0100 |
| IL-10 | eBioscience | BMS614-2FIVE |
| IL-12 | Biolegend, USA | 433607 |
| TGF-β | Alpco, USA | SMB100B |
| TNF-α | Biolegend, USA | 430907 |
| IFN-γ | Alpco, USA | MBS2506010 |
| CD3-APC | Miltenyi Biotec, Germany | REA641/130-122-943 |
| CD4--FITC | Miltenyi Biotec, Germany | GK1.5/130-120-819 |
| Foxp3-PE | Miltenyi Biotec, Germany | REA788/130-111-600 |

**
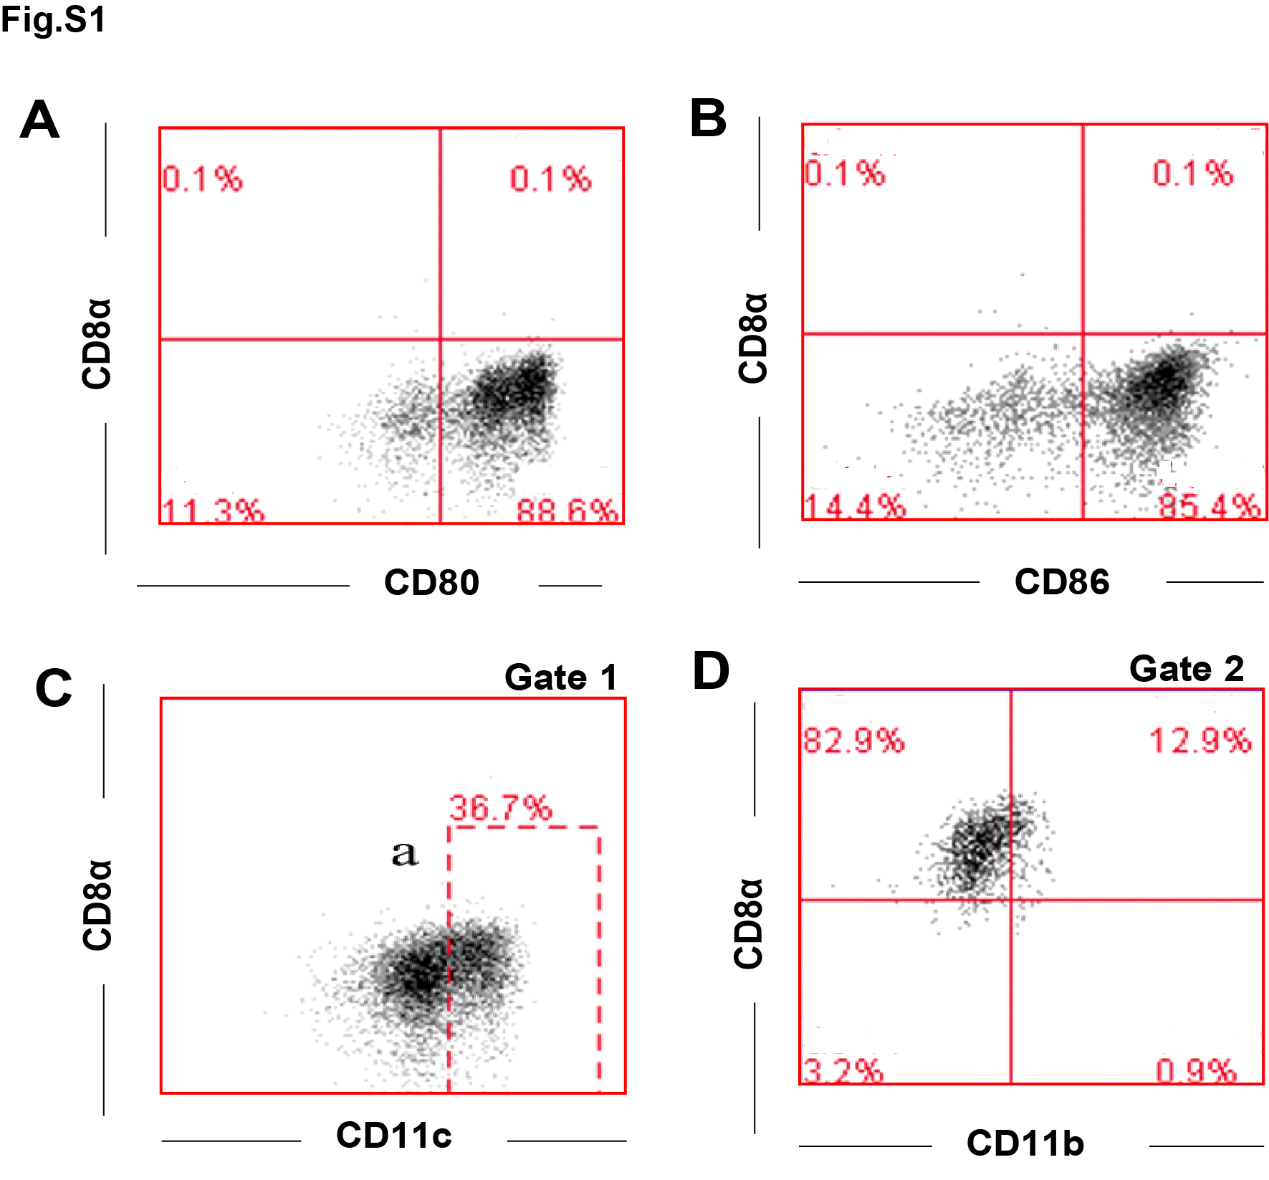
Supplemental figure legend**

Fig.S1 CD40 Ab and OK-432 synergistically activate the expression of CD80.

A, B. Identification of dendritic cells (DCs). DC-associated markers (CD8α, CD80, CD86, CD11c, and CD11b) were employed to identify the subset of DCs, which was achieved by FCM. DCs marked by the co-stimulatory signals (CD80, CD86) are more than 85%. 36.7% were marked by DCs defining marker CD11c, among of which 12.9% were CD11b-marked cells. And these markers defined the DC subset that is committed to play critical role in T cell activation.

C, D. CD40 Ab and OK-432 synergistically activate the expression of CD80. The experiment was performed in six groups, including three control groups: Neg-Ctrl (without any agent), Ag-Ctrl (with anergic antigen), and TNF-α (positive control), and three test groups: CD40 Ab, OK-432, and 40432 group (combinational group, CD40 Ab and OK-432). Compared to the control groups (Neg-Ctrl, Ag-Ctrl, and TNF-α), expression of CD80 can be separately improved by CD40 Ab, and OK-432, and the synergistic group 40432 was most significantly improved.
